# Cheater suppression and spite through quorum sensing

Alexander S. Moffett<sup>a</sup>, Peter J. Thomas<sup>b</sup>, Michael Hinczewski<sup>c</sup>, and Andrew W. Eckford<sup>a,1</sup>

<sup>a</sup>Department of Electrical Engineering and Computer Science, York University, Toronto, Ontario M3J 1P3, Canada

<sup>b</sup>Department of Mathematics, Applied Mathematics, and Statistics, Case Western Reserve University, Cleveland, Ohio 44106, USA

<sup>c</sup>Department of Physics, Case Western Reserve University, Cleveland, Ohio 44106, USA

June 16, 2021

## Abstract

The evolutionary consequences of quorum sensing in regulating bacterial cooperation are not fully understood. In this study, we reveal unexpected consequences of regulating public good production through quorum sensing on bacterial population dynamics, showing that quorum sensing can be a “spiteful” alternative to unregulated production. We analyze a birth-death model of bacterial population dynamics accounting for public good production and the presence of non-producing cheaters. Our model demonstrates that when demographic noise is a factor, the consequences of controlling public good production according to quorum sensing depend on the cost of public good production and the presence of alternative sources of the fitness benefits provided by public goods. When public good production is inexpensive, quorum sensing is a spiteful alternative to unconditional production, in terms of the mean population extinction time. When costs are higher, quorum sensing becomes a selfish strategy for the producing strain, both stabilizing cooperation and decreasing the risk of population extinction.

Cooperative behavior is widespread in bacteria [1], including coordinated swarming and public good production. These behaviors are often regulated through quorum sensing (QS) [2], in which individual bacteria produce and export small molecules called autoinducers (AI). When AI molecules accumulate to a sufficiently high concentration in the environment, and consequently within the bacteria producing them, they activate operons controlling the expression of genes critical for cooperation. While the biochemistry of some QS systems is well understood [2], there are many proposed biological functions of QS which have been the subject of debate [3, 4, 5, 6, 7].

Evolutionary questions concerning QS function have largely focused on the ability of QS-controlled cooperation to combat invasion by non-cooperating cheaters in bacterial populations [8, 9]. The question of how cooperation can evolve and be maintained in populations is a general problem in evolutionary biology [10], and the role of QS in the evolution of bacterial cooperation is of great interest in understanding bacterial social interactions. A number of possible resolutions to the problem of social cheaters in bacterial public good production include punishment of cheaters [11], dispersal into subpopulations [12], and the use of QS to regulate cooperation [1, 13, 6]. Regulation of public good production through QS has been shown to reduce the ability of cheaters to invade a population of producers [14].

The role of QS in maximizing population growth in the absence of cheaters has also been investigated as a rationale for QS-control of public good production. Because public goods produced by bacteria can have density-dependent fitness benefits [15], regulation of public good production based on population density can be seen as an optimal control solution to maintaining a maximal population size balancing metabolic costs and benefits [16, 17]. By maintaining a maximal population size, a population also maximizes its mean time to extinction, which is especially important with the possibility of unpredictable environmental changes.

Considering the threat of both cheater invasion and the onset of harmful environmental conditions that could lead to population extinction, there is a tension in the degree to which public good production is regulated. Unconditional public good production appears to be a self-defeating strategy, where non-producing

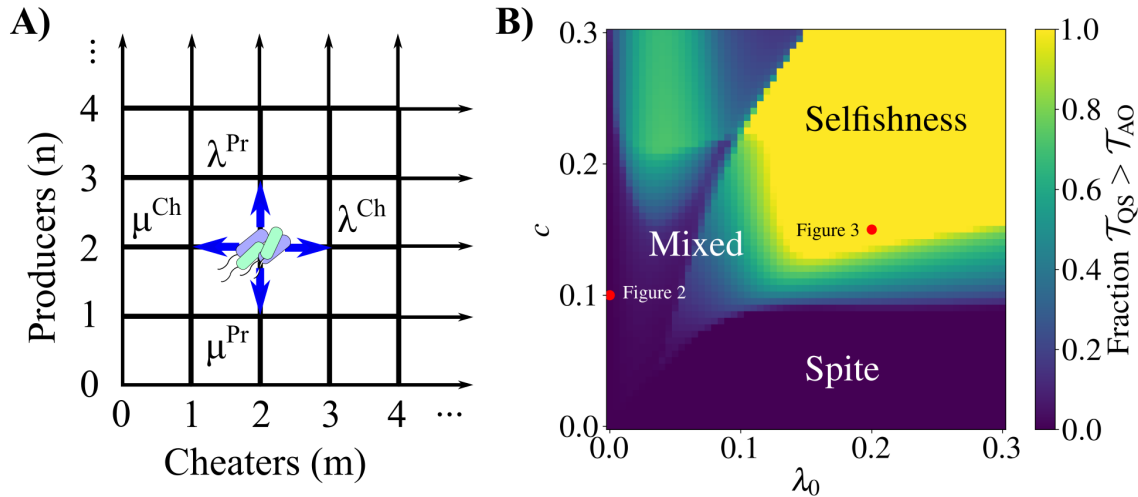

Figure 1: Overview of birth-death model and main results. A) Diagram of the two-dimensional birth-death process describing the dynamics of a bacterial population consisting of public good producers and cheaters. As an example, the population is shown with two producers and two cheaters. All possible subsequent states of the population are indicated, where a single producer or cheater can either arise through binary fission (with state-dependent rates  $\lambda^{\text{Pr}}$  and  $\lambda^{\text{Ch}}$ , respectively) or can die (with state-dependent rates  $\mu^{\text{Pr}}$  and  $\mu^{\text{Ch}}$ ). See Eqs. 1-4 for the full forms of the birth and death rates. B) Phase diagram describing the fitness gains of quorum sensing (QS) over always on (AO) producers, as a function of constitutive growth rate ( $\lambda_0$ ) and public good production cost ( $c$ ). For each pair ( $\lambda_0, c$ ) we calculated the mean extinction time for all ( $n, m$ ) pairs satisfying  $n \geq 0, m \geq 0$ , and  $n + m \leq 100$  with the QS and AO strategies. The reported number is the fraction of these ( $n, m$ ) pairs for which the mean extinction time for QS is greater than for AO ( $\mathcal{T}_{n,m}^{\text{QS}} > \mathcal{T}_{n,m}^{\text{AO}}$ ). In the bottom right-hand region (dark blue) regulating public good production through QS decreases mean extinction time for all ( $n, m$ ) pairs, meaning that the AO strategy decreases the risk of population extinction. Here, QS is a spiteful strategy. The upper region (yellow) is where QS increases the mean extinction time for all ( $n, m$ ), a selfish strategy for the producers. The region labeled “mixed” indicates that QS increases mean extinction time for some ( $n, m$ ) pairs while decreasing it for others.

cheaters will arise by mutation and reap all the benefits of public goods without experiencing any of the associated production costs. At the other extreme, a strategy where no public goods are produced (which could be a result of a successful cheater invasion of a cooperating population) should be vulnerable to extinction when the public goods are essential for growth or reducing the likelihood of death. The idea that quorum sensing is a moderate strategy between these two extremes has been explored previously [18]. However, to our knowledge, a full analysis of this tension explicitly considering both cheater fixation probability and mean population extinction time has not been carried out. What are the effects of QS-mediated regulation of public good production in terms of cheater suppression and overall population robustness? Does QS always protect against cheaters while also increasing long-term viability of the population?

In this work, we explore the effects of QS on cheater fixation and mean population extinction time in simple birth-death models of mixed producer-cheater populations. We compare the QS strategy of public good production with an “always on” (AO) strategy, meaning that each producer cell unconditionally produces public goods at the maximum rate. Our models reflect bacterial populations where demographic stochasticity is an important factor in population dynamics. The role of demographic stochasticity in bacterial populations has been explored in past work [19, 20], and is particularly important when populations are divided into subpopulations, as is the case with *Pseudomonas aeruginosa* lung infections [21] for example. Additionally, Joshi and Guttal recognized demographic noise as a possible factor in the evolution of QS in populations of fixed size [22]. We use the QS system controlling production of proteases by *P. aeruginosa* as inspiration for our model, where public goods increase the growth rate of all individuals while leaving death rates unaffected.

We find that while QS decreases cheater fixation probability for all examined public good costs and constitutive growth rates (growth rate in the absence of public goods), the population mean extinction time is only increased by QS for a well-defined set of cost-growth rate pairs. The cases where QS decreases mean extinction time as compared with an unconditional AO strategy are analogous to spiteful behavior [23, 24], where QS reduces the relative fitness of the cheater strain while the entire population of both producers and cheaters is made more vulnerable to extinction. Only when both the cost of public good production and

the constitutive growth rate are large enough is QS a selfish strategy for the producers, in that both cheater fixation probability is reduced and mean extinction time is increased. We discuss the relationship between our analogy of spite and selfishness and the definitions used in the literature in the Conclusions section.

## 1 Model

We consider well-mixed populations of bacteria growing according to birth-death models with no mutation or migration (Fig. 1A). Public goods are modeled implicitly through their costs and benefits as reflected in the birth rates. We write the birth rates as  $\lambda_{n,m}^{\text{Pr}}$  and  $\lambda_{n,m}^{\text{Ch}}$  for producers and cheaters, respectively. The subscript  $n$  and  $m$  are the number of producers and cheaters present, reflecting the dependence of the rates on the population state. The death rates are  $\mu_{n,m}^{\text{Pr}}$  and  $\mu_{n,m}^{\text{Ch}}$ . See Eqs. 1-4 for full forms of the birth and death rates.

Our model accounts for AI and public good production and degradation as well as density-dependent fitness benefits of public goods directly in the birth rates. This simplification rests on several assumptions. We assume that the timescales associated with AI and public good production and degradation are much faster than those of births and deaths. Under this assumption, the AI and public good concentrations quickly reach a steady state upon a bacterial birth or death, so that the effects of both concentrations on the birth rates is only a function of the state of the population. Similarly, the growth benefits of public goods are assumed to be a function of the current population state, namely a non-decreasing, saturating function of  $n$ . Another assumption is that all individuals within a given strain (producer or cheater) exhibit exactly the same birth and death rates. In reality, the stochasticity of subcellular events and diffusion of extracellular molecules leads to heterogeneous growth rates even in clonal populations [25]. Our approach simplifies analysis while providing a description of mean birth and death rates.

In order to evaluate the evolutionary success of mixed producer-cheater populations, we calculate the cheater fixation probability ( $\pi^{\text{Ch}}$ ), mean first passage time to cheater fixation ( $\tau^{\text{Ch}}$ ), and mean population extinction time ( $\mathcal{T}$ ) for all pairs of  $n$  producers and  $m$  cheaters where  $n + m \leq N$ . We define  $N$  as a maximal population size large enough that the line  $n + m \leq N$  effectively acts as a reflecting boundary. An appropriate choice of  $N$  then depends on the birth and death rates used. Solutions of all three quantities of interest come from solving backward Kolmogorov equations, as detailed in the Materials and Methods section. We validate the results from these solutions through stochastic simulations [26, 27].

## 2 Results and Discussion

The phase diagram in Fig. 1B shows the fraction of  $(n, m)$  pairs in the set  $\{(n, m) \in \mathbb{Z}^2 \mid n, m > 0, n + m \leq 100\}$  in which the mean extinction time of a population regulating public good production through QS is larger than that using the AO strategy, as a function of the constitutive per capita growth rate,  $\lambda_0 \geq 0$ , and the cost of public good production,  $0 \leq c \leq 1$ , representing the fraction of growth rate benefit provided by public goods alone. We first examine two points of interest on this phase diagram,  $c = 0.1$ ,  $\lambda_0 = 0$  and  $c = 0.15$ ,  $\lambda_0 = 0.2$  as marked in Fig. 1B, and then discuss the general features of the phase diagram.

### 2.1 Quorum sensing is a spiteful strategy in the absence of alternative nutrition sources

In agreement with previous work [14, 28], we find that in the absence of alternate sources of nutrition ( $\lambda_0 = 0$ ), QS reduces the probability of cheater fixation for a wide range of starting population compositions (Fig. 2). We calculate the probability of cheaters fixing (Eq. 9) in a small population with starting compositions satisfying  $0 < n$ ,  $0 < m$ , and  $n + m \leq 100$ . We compare cases where no public good is produced (NP), where public good production is QS-controlled, and where public good production is always on (AO). Because there is no constitutive growth rate ( $\lambda_0 = 0$ ), if the NP strategy is used there is no  $(n, m)$  pair for which the net population growth rate is non-negative. On the other hand, for the QS and AO populations, the white lines in Fig. 2 represent the total population zero expected net growth contour. Because these lines represent the zero expected net growth rate contours of the entire population, they are not fixed points of the underlying deterministic behavior of the system, which only exist at the origin and at the intersection of the

zero expected net growth contours with the producer axis. Thus, there can not be a long-lived population with a non-zero number of cheaters.

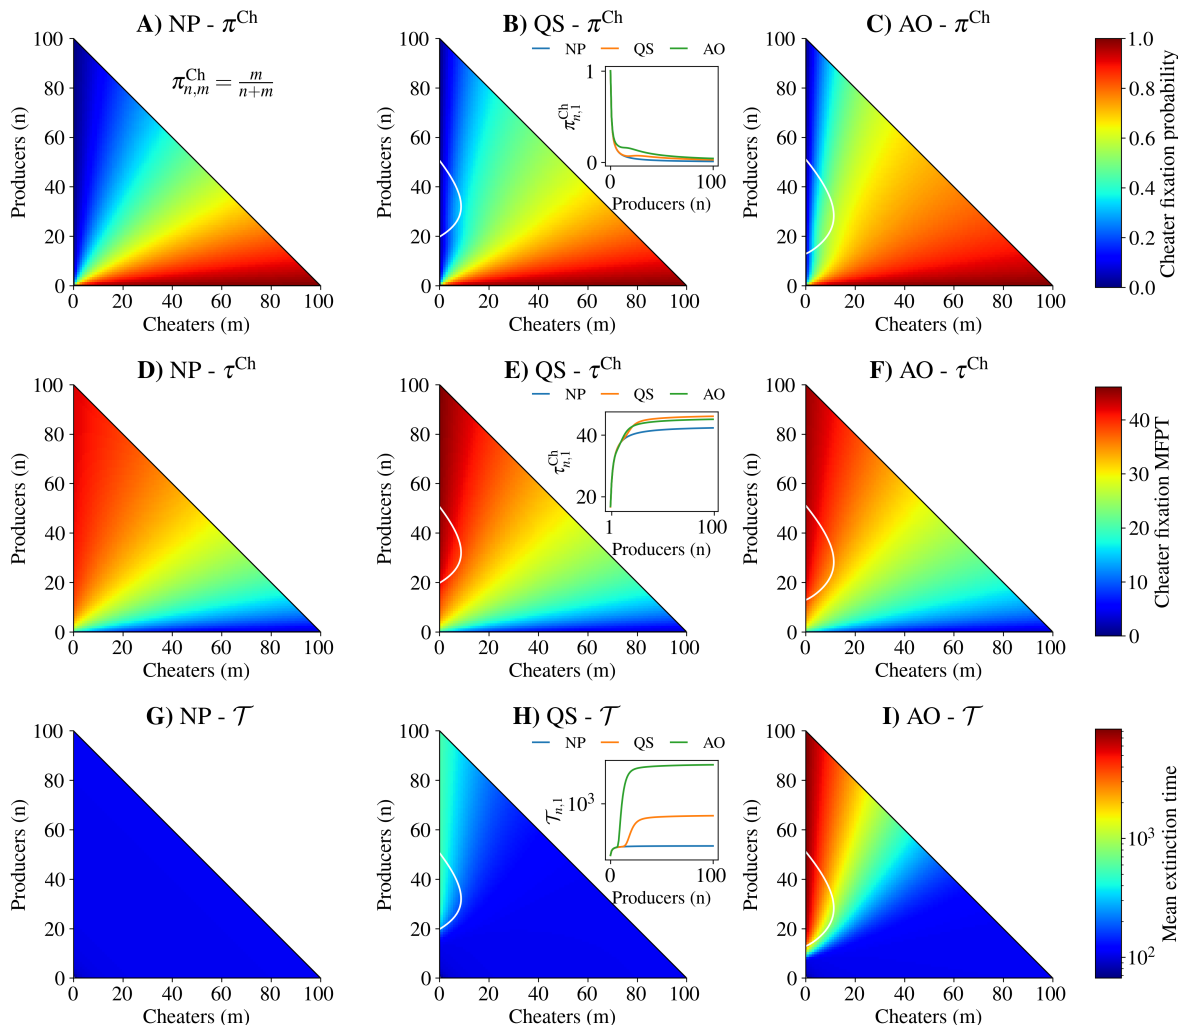

Figure 2: Quorum sensing is a spiteful strategy for producers when no alternate energy source is present ( $\lambda_0 = 0$ ) and when public good cost is moderate ( $c = 0.1$ ). Row 1: Cheater fixation probability from an initial population of  $n$  producers and  $m$  cheaters for A) no production (NP), B) quorum sensing (QS), and C) always on (AO) strategies. Row 2: Conditional mean first passage time to cheater fixation from initial population structure for D) no production, E) quorum sensing, and F) always on strategies. Row 3: Mean extinction time from initial population structure for G) no production, H) quorum sensing, and I) always on strategies. White traces: zero expected net total population growth contours. Inset plots in B), E), and H) show cheater fixation probability, cheater mean first passage time to fixation, and mean extinction time, respectively, for an initial population with one cheater and  $n$  producers. See Table S1 for parameter values.

With a moderate cost to public good production (10% of the maximum growth rate benefit imparted by public goods), a QS strategy (Fig. 2B) increases cheater fixation probability as compared with an NP strategy (Fig. 2A) while decreasing cheater fixation probability as compared with an AO strategy (Fig. 2C). This can be clearly seen in an invasion scenario with a single cheater present in the population (Fig. 2C inset). For any public good production strategy, without any elaborate solutions such as policing [29] it is unavoidable that cheaters will become more likely to fix in a population. However, QS mitigates this possibility as compared with an AO strategy. Both the QS and AO strategies (Fig. 2E-F) increase the mean time to extinction as compared with the NP strategy (Fig. 2D). Our results match well with simulations (Figs. S1 & S2).

In order to explore the fitness advantages of public good production to the total population, we calculated the mean time to extinction of the population given an initial composition of producers and cheaters. The mean extinction time has been proposed as a general measure of fitness [30] and has the advantage over

geometric mean growth rate [31] that it can be applied to populations with limited growth. While QS reduces the probability of cheater fixation as compared to AO, the mean extinction time with QS (Fig. 2H) is greatly reduced as compared to AO (Fig. 2I). This suggests that with no alternate sources of nutrition, QS increases the relative fitness of producers while decreasing the overall population fitness as compared with AO. This scenario is analogous to evolutionary spite [23, 24], suggesting that QS may be spiteful behavior in certain situations as compared with AO. For most, but not all,  $(n, m)$  pairs, the mean extinction time for QS is larger than for AO. This places the system in the “mixed” region of the phase diagram (Fig. 1B).

The qualitative differences in cheater fixation probabilities and mean extinction times between QS and AO were preserved for systems with carrying capacities of 200 (Fig. S3), twice the size considered in Figs. 2 (see Tables S1 & S2 for the parameters used). While this does not guarantee that the spiteful nature of QS in these conditions is independent of populations size, it does demonstrate insensitivity to the overall population size. Given that our model is not parameterized by experimental results, the population sizes we consider do not directly correspond to population sizes in real bacterial colonies. Instead, our model aims to capture key aspects of bacterial population dynamics when demographic noise plays a role, as discussed in the Introduction. The degree of demographic noise is related to the size of a population through the law of large numbers, where the standard deviation in the population size over the mean number of individuals is inversely proportional to the square root of the population size. For this reason we focus on small populations, where demographic noise is relatively large.

## 2.2 Alternative sources of nutrition enable QS to give a non-spiteful advantage to producers

Bacterial populations need not rely solely on the growth benefits of a public good. In some cases they may use alternative sources of nutrition which are not directly influenced by public good production. We consider the case in which the constitutive growth rate for individuals with zero public goods present is non-zero but small (20% of the maximal growth rate benefit provided by public goods alone). This non-zero constitutive growth rate allows for a small carrying capacity to appear in the NP case, indicated by the white line in the leftmost column of Fig. 3. With the QS and AO strategies, the zero expected net growth contour reflects the NP carrying capacity when the number of producers is low, but increases markedly with more producers. Additionally, more cheaters can be accommodated with more producers present because of the public nature of the fitness benefits provided by producers. As in Fig. 2, the only fixed points of the underlying deterministic dynamics are the origin and the intersections of the zero expected net growth contour with the axes.

As in the case of zero constitutive growth, QS (Fig. 3B) decreases the probability of cheater fixation over AO (Fig. 3C) for a wide range of starting population compositions, while increasing the fixation probability compared to NP (Fig. 3A). The improvement of QS over AO can be clearly seen in the cheater invasion scenario in the inset of Fig. 3B. However, with non-zero constitutive growth the mean time to cheater fixation for NP (Fig. 4D) and QS (Fig. 3E) are comparable, while cheaters fix more quickly for AO (Fig. 3F). Again, our results match well with simulations (Figs. S4 & S5).

The presence of an alternative source of nutrition renders QS a non-spiteful, beneficial strategy for producers (Fig. 3) at a moderate public good production cost (15%). QS increases the mean extinction time of the population for all starting population compositions with at least one cheater and one producer over AO (Fig. 3H-I). From comparison with (Fig. 2), it appears that the degree to which growth depends on alternative nutrition sources influences whether QS at moderate costs is spiteful or beneficial.

As when there is no constitutive growth, the qualitative differences between QS and AO were preserved for systems with carrying capacities of 200 as shown in Fig. S6 (see Tables S1 & S2 for parameters).

## 2.3 Autoinducer production by cheaters is a spiteful strategy

To this point, we have assumed that cheaters produce neither public goods nor autoinducer. What are the consequences of cheaters producing autoinducer while still not producing public goods? We performed the same analysis as in the previous sections using the growth rates in Eqs. 5 & 6 which reflect equal autoinducer production by producers and cheaters. We compared these results to those presented in Fig. 3, where an alternative nutrition source exists and cheaters do not produce autoinducer. Cheater signaling increases the

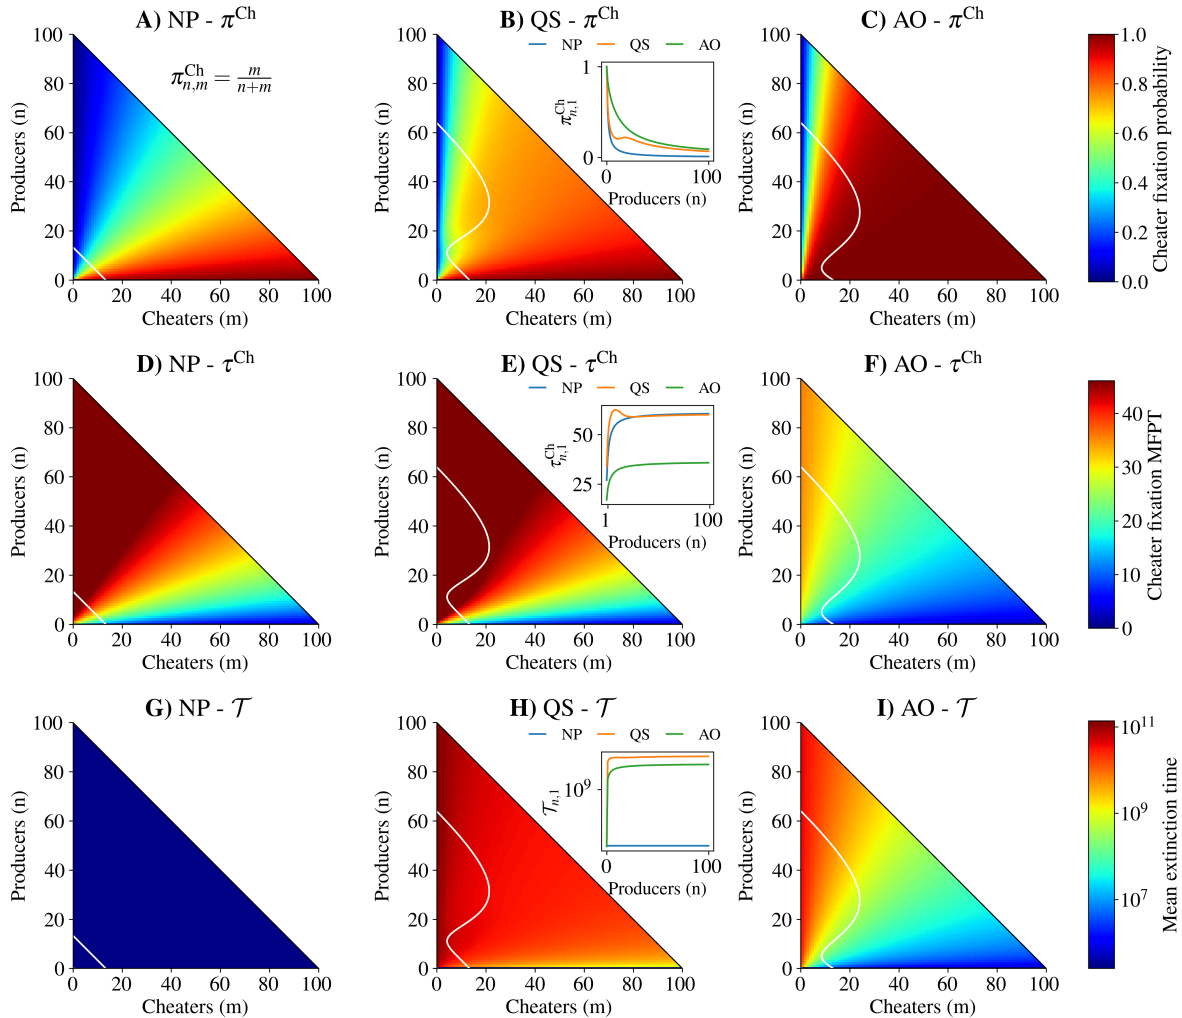

Figure 3: Quorum sensing is a selfish strategy for producers when an alternate energy source is present ( $\lambda_0 = 0.2$ ) and when public good cost is moderate ( $c = 0.15$ ). Row 1: Cheater fixation probability from an initial population of  $n$  producers and  $m$  cheaters for A) no production (NP), B) quorum sensing (QS), and C) always on strategies (AO). Row 2: Conditional mean first passage time to cheater fixation from initial population structure for D) no production, E) quorum sensing, and F) always on strategies. Row 3: Mean extinction time from initial population structure for G) no production, H) quorum sensing, and I) always on strategies. White traces: zero expected net total population growth contour. Inset plots in B), E), and H) show cheater fixation probability, cheater mean first passage time to fixation, and mean extinction time, respectively, for an initial population with a single cheater and  $n$  producers. See Table S1 for parameter values.

probability of cheater fixation while decreasing the mean time to cheater fixation and the mean extinction time (Fig. 4). From the perspective of the cheater population, autoinducer production is a spiteful strategy. Even though cheater signaling decreases mean extinction time, this result suggests that signaling cheaters are more likely to be observed in nature than non-signaling cheaters, provided that signaling cheater mutations are at least as likely to occur in a population as non-signaling cheater mutations.

## 2.4 The spiteful or selfish nature of QS depends on cost and constitutive growth

The phase diagram in Fig. 1B demonstrates the role of both public good production cost and constitutive growth rate in determining the nature of QS outcomes. At low constitutive growth rates, public good production is essential to the survival of the population. With low  $\lambda_0$ , QS regulation of public good production moves to the “mixed” region of the phase diagram at relatively low public good costs. This means that whether QS is beneficial to the population depends on the initial composition of the population. For low constitutive growth rates below  $\lambda_0 = 0.1$ , all values of public good cost investigated lead to a mix of spite

and selfishness. With larger constitutive growth rates the transition from spite to selfishness with increasing cost  $c$  occurs gradually with the transition to selfishness completing at  $c = 0.1$  to  $c = 0.15$ , depending on  $\lambda_0$ . For all  $(c, \lambda_0)$  pairs with  $c > 0$ , the cheater fixation probability is reduced in QS as compared with AO S7.

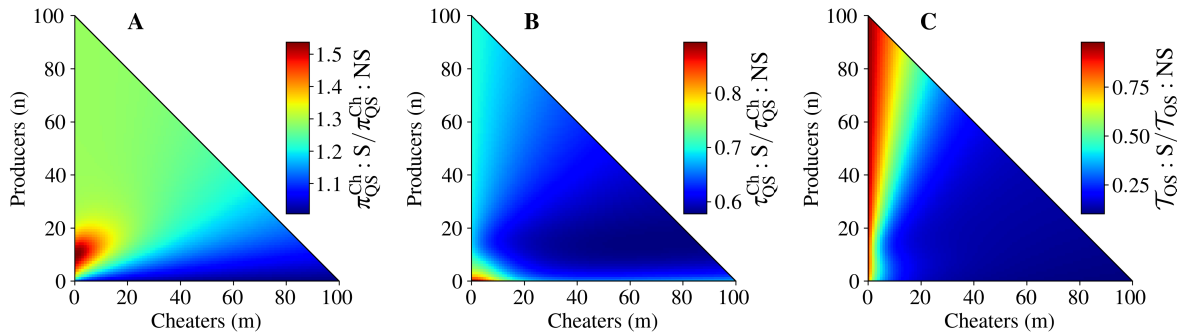

Figure 4: Cheater autoinducer production is spiteful in the presence of an alternative source of nutrition ( $\lambda_0 = 0.2$ ). The ratio of A) cheater fixation probability, B) cheater mean fixation time, and C) mean extinction time between QS populations where cheaters signal (indicated by S) to where cheaters do not signal (indicated by NS). The non-signaling results used in the denominators are the same as those in Fig. 3. See Table S1 for parameter values.

We show the ratio  $\mathcal{T}_{QS}/\mathcal{T}_{AO}$  for all  $(n, m)$  pairs for two sequences of  $(c, \lambda_0)$  pairs in Figs. S8 and S9. With fixed  $c = 0.2$ , the ratio  $\mathcal{T}_{QS}/\mathcal{T}_{AO}$  is always highest with intermediate mixtures of producers and cheaters (Fig. S8). When  $\lambda_0 \approx 0.1$ , there is a transition from the mixed region to the selfish region, where  $(n, m)$  pairs with few cheaters appear to be slower to change to selfishness with increasing  $\lambda_0$ . With fixed  $\lambda_0 = 0.2$ , there is a gradual transition from spite at low  $c$  to selfishness at high  $c$  (Fig. S9). At moderate costs below  $c = 0.1$ , QS is spiteful, with  $\mathcal{T}_{QS} < \mathcal{T}_{AO}$  for all  $(n, m)$  pairs. However, once the cost reaches 0.15, QS is no longer spiteful, as the mean extinction time is decreased with respect to AO. In the transition range from  $c = 0.1$  to  $c = 0.15$ , the ratio  $\mathcal{T}_{QS}/\mathcal{T}_{AO}$  is highest when the number of producers is low, suggesting that QS is most beneficial with those initial population structures. The mean extinction time is further reduced by QS at a cost of 0.2, again most drastically when  $n$  is small.

### 3 Conclusions

Our model of competitive growth between bacterial producers and cheaters reveals a number of previously unexplored consequences of quorum sensing. When public good production allows for metabolism of otherwise inaccessible sources of nutrients, we demonstrate the important role of both the availability of alternative, public good-independent nutrients and the cost of public good production in determining the consequences of quorum sensing. With no alternative nutrients, quorum sensing by producers withholds the only source of nutrients from the whole population, which harms both producers and cheaters in terms of the total population’s mean extinction time. We identify this result as analogous to spite, as quorum sensing reduces the absolute fitness of both producers and cheaters in terms of mean extinction time. If instead there is an alternate energy source, then regulating public good production via quorum sensing reduces the probability of cheater fixation, while increasing the mean extinction time of the population over the always on strategy, depending on the public good production cost.

The spite region in Fig. 1 can be understood heuristically by considering that, if the cost of public good production is low, QS-mediated regulation of public good production withholds the fitness benefits of the public good while achieving minimal metabolic savings for the producers. In addition, large alternate sources of nutrition can help to offset the costs of public good production, reducing loss in relative producer fitness due to costs. On the other hand, when public good production is costly, QS-mediated production balances costs and benefits by delaying public good production until the population of producers is large enough to benefit. Thus both public good production cost and constitutive growth rate play an important role in determining the evolutionary effects of QS-based regulation.

Our microbial protagonists appear to be confronted with a grim situation, as implied by the dichotomy between what we have called “selfishness” and “spite” when QS is used to regulate public good production

as opposed to an unconditional approach. However, we emphasize that “selfishness” in this context means that QS stabilizes cooperation (production of public goods) and reduces the risk of population extinction. On the other hand, “spite” means that while QS may still stabilize cooperation, unconditional cooperation is beneficial to the population as a whole, in that the mean extinction time is higher than when QS is used to regulate cooperation.

Our use of spite and selfishness refer to inter-strain relationships based on the alternatives of QS and AO, whereas analyzing the costs and benefits between an individual bacterium and other members of its strain would lead one to conclude that public good production is an altruistic behavior compared with the alternative of non-production. Altogether, the comparison between the alternate strategies of QS and AO, as well as our use of cheater fixation probability and mean extinction time to define the two terms, distinguish our meanings of “spite” and “selfishness” from more common uses. Previous work has recognized the production of bacteriocidins by *P. aeruginosa* as spiteful behavior [32]. However, to the best of our knowledge, the conditionally spiteful nature of quorum sensing as compared with unregulated public good production is a novel observation and interpretation.

By using QS instead of AO, producers harm cheaters by reducing their access to public goods when producer population density is low. The producers directly benefit from suppression of cheaters, which seems to indicate that QS is a selfish behavior. Additionally, in our model, there is no third strain with relatively high relatedness to the producers that could indirectly benefit from cheater suppression, an accepted mechanism for the evolution of spite [23]. However, our study of cheater fixation probability and mean extinction time does not translate cleanly to the Hamiltonian framework [33, 34] and we can not say anything conclusive about whether spite through QS is likely to evolve, only that it is possible in small populations. A model considering growth of small subpopulations linked by migration could provide insight into how the balance of cheater fixation and population extinction impacts the fate of the larger population, as we might expect to see in nature.

It would be interesting to explore the impact of mutation, migration, and horizontal gene transfer on our results, where a stable heterogeneous steady state could possibly be achieved. In addition, one could explicitly consider the role of compartmentalization through a spatial component in the model, which could also incorporate the linkage of limited dispersal and kinship [6] in terms of public goods production.

## 4 Materials and Methods

### 4.1 Birth and death rates

We use birth-death models to describe the population dynamics of a bacterial colony with both public good producers and cheaters. We assume the timescales of both autoinducer and public good production and degradation are much shorter than those of population growth. Consequently, we write per capita birth and death rates solely as a function of the number of producers and cheaters in the population. We also assume that QS is sensitive to population density. While a number of other explanations for the function of QS exist, as noted in the Introduction, all of them depend to some degree on population density.

The birth and death rates in our models take into account the costs and benefits of public good production. We use  $\lambda$  to denote birth rates and  $\mu$  to denote death rates, with the superscript Pr for producers and Ch for cheaters. Let  $n$  be the number of producers in the population and  $m$  be the number of cheaters. Let  $\lambda_0$  be the birth rate due to an alternative energy source that does not require proteases for bacteria to utilize, and let  $\mu_0$  be the constant death rate. We assume that the per-capita death rate increases linearly with the total population size through some density-dependent mechanism such as the production of toxic byproducts. We denote the maximal growth rate due to nutrients derived from protease activity as  $g$  and the maximal cost of protease production, in terms of growth rate, as  $c$ . Parameters  $K_g$  and  $K_a$  control the number of producers for which protease-derived growth rate and protease production are half-maximal, respectively. Finally,  $h_g$  and  $h_a$  control the shape of the protease-derived growth rate and protease production rate functions. The



full birth and death rates are

$$\lambda_{n,m}^{\text{Pr}} = \max \left( \left[ \lambda_0 + \left( g \frac{(n/K_g)^{h_g}}{1 + (n/K_g)^{h_g}} - c \right) \frac{(n/K_a)^{h_a}}{1 + (n/K_a)^{h_a}} \right] n, 0 \right) \quad (1)$$

$$\mu_{n,m}^{\text{Pr}} = \mu_0(n+m)n \quad (2)$$

$$\lambda_{n,m}^{\text{Ch}} = \left[ \lambda_0 + g \frac{(n/K_g)^{h_g}}{1 + (n/K_g)^{h_g}} \frac{(n/K_a)^{h_a}}{1 + (n/K_a)^{h_a}} \right] m \quad (3)$$

$$\mu_{n,m}^{\text{Ch}} = \mu_0(n+m)m. \quad (4)$$

The Hill function forms of these rates are similar to those in previous work [35, 36]. The strategy taken by a particular strain in controlling public good production is controlled by the parameters  $K_a$  and  $h_a$ . The parameter  $K_a$  controls when public good production is half-maximal, while  $h_a$  controls the shape of the activation curve. For an “always-on” strain, we take the limit  $K_a \rightarrow 0$  so that public good production is always maximal, independent of the producer population size. For a “no production” strain, we take  $K_a \rightarrow \infty$  so that the public good is never produced.

We set the maximum public good birth rate to  $g = 1$  in all cases, so that all other birth rate parameters can be considered to be in units of maximum public good birth rate. In general we consider the parameters  $g$ ,  $K_g$ ,  $h_g$ ,  $c$ , and  $\lambda_0$  to be properties of the public good and environment which cannot be changed by bacterial strategy. Similarly, we consider the parameter  $\mu_0$  to be a joint property of the bacterial species and the environment. As we have stated,  $K_a$  and  $h_a$  constitute the choice of public good regulation strategy.

For the special case where cheaters produce autoinducer but not public goods, we modify the birth rates to

$$\lambda_{n,m}^{\text{Pr}} = \max \left( \left[ \lambda_0 + \left( g \frac{(n/K_g)^{h_g}}{1 + (n/K_g)^{h_g}} - c \right) \times \frac{((n+m)/K_a)^{h_a}}{1 + ((n+m)/K_a)^{h_a}} \right] n, 0 \right) \quad (5)$$

$$\lambda_{n,m}^{\text{Ch}} = \left[ \lambda_0 + g \frac{(n/K_g)^{h_g}}{1 + (n/K_g)^{h_g}} \frac{((n+m)/K_a)^{h_a}}{1 + ((n+m)/K_a)^{h_a}} \right] m \quad (6)$$

under the assumption that producers and cheaters contribute autoinducer equally. The parameter values we have used are summarized in Table S1.

## 4.2 Fixation probabilities and mean first passage times

The dynamics of the probability distribution over  $n$  and  $m$  at time  $t$  given  $n'$  and  $m'$  at an earlier time  $s$  ( $s < t$ ) is governed by the forward Kolmogorov equation

$$\begin{aligned} \frac{\partial}{\partial t} P(n, m, t \mid n', m', s) = & \lambda_{n-1,m}^{\text{Pr}} P(n-1, m, t \mid n', m', s) \\ & + \mu_{n+1,m}^{\text{Pr}} P(n+1, m, t \mid n', m', s) \\ & + \lambda_{n,m-1}^{\text{Ch}} P(n, m-1, t \mid n', m', s) \\ & + \mu_{n,m+1}^{\text{Ch}} P(n, m+1, t \mid n', m', s) \\ & - \left( \lambda_{n,m}^{\text{Pr}} + \mu_{n,m}^{\text{Pr}} + \lambda_{n,m}^{\text{Ch}} + \mu_{n,m}^{\text{Ch}} \right) P(n, m, t \mid n', m', s) \end{aligned} \quad (7)$$

where  $n, m, n', m' \in \{0, 1, 2, \dots\}$ . For birth and death rates linear in  $n$  and  $m$ , the system of coupled differential equations represented by Eq. 7 can be solved exactly using a generating function approach [37]. However, the birth and death rates required for our purposes are nonlinear, and we adopt a computational approach.

The main quantities of interest in this work are the probability of cheater fixation and the mean population extinction time. These quantities can be calculated from the backward Kolmogorov equation

$$\begin{aligned} \frac{\partial}{\partial s} P(n, m, t | n', m', s) = & \\ & \lambda_{n', m'}^{\text{Pr}} \left( P(n, m, t | n' + 1, m', s) - P(n, m, t | n', m', s) \right) \\ & \mu_{n', m'}^{\text{Pr}} \left( P(n, m, t | n' - 1, m', s) - P(n, m, t | n', m', s) \right) \\ & \lambda_{n', m'}^{\text{Ch}} \left( P(n, m, t | n', m' + 1, s) - P(n, m, t | n', m', s) \right) \\ & \mu_{n', m'}^{\text{Ch}} \left( P(n, m, t | n', m' - 1, s) - P(n, m, t | n', m', s) \right) \end{aligned} \quad (8)$$

We define a maximum pure producer or cheater population size  $N$  and construct an  $(N + 1)^2 \times (N + 1)^2$  matrix describing the transition rates between all states and use it to solve for our quantities of interest. Given the birth and death rates we use, we assume that the approximation introduced by considering a finite rate matrix is reasonable when net growth rates are negative and have a large magnitude in all states where  $m = N$  or  $n = N$ . For the probability that cheaters will fix in the population, we solve [37]

$$\begin{aligned} \lambda_{n, m}^{\text{Pr}} (\pi_{n+1, m}^{\text{Ch}} - \pi_{n, m}^{\text{Ch}}) + \mu_{n, m}^{\text{Pr}} (\pi_{n-1, m}^{\text{Ch}} - \pi_{n, m}^{\text{Ch}}) \\ + \lambda_{n, m}^{\text{Ch}} (\pi_{n, m+1}^{\text{Ch}} - \pi_{n, m}^{\text{Ch}}) + \mu_{n, m}^{\text{Ch}} (\pi_{n, m-1}^{\text{Ch}} - \pi_{n, m}^{\text{Ch}}) = 0 \end{aligned} \quad (9)$$

with boundary conditions

$$\pi_{0, m}^{\text{Ch}} = 1, \text{ for } n = 0 \text{ and } 0 < m \leq N \quad (10)$$

$$\pi_{n, 0}^{\text{Ch}} = 0, \text{ for } 0 \leq n \leq N \text{ and } m = 0. \quad (11)$$

For the mean first passage time conditioned on cheater fixation, we solve

$$\begin{aligned} \lambda_{n, m}^{\text{Pr}} (\theta_{n+1, m}^{\text{Ch}} - \theta_{n, m}^{\text{Ch}}) + \mu_{n, m}^{\text{Pr}} (\theta_{n-1, m}^{\text{Ch}} - \theta_{n, m}^{\text{Ch}}) \\ + \lambda_{n, m}^{\text{Ch}} (\theta_{n, m+1}^{\text{Ch}} - \theta_{n, m}^{\text{Ch}}) + \mu_{n, m}^{\text{Ch}} (\theta_{n, m-1}^{\text{Ch}} - \theta_{n, m}^{\text{Ch}}) = -\pi_{n, m}^{\text{Ch}} \end{aligned} \quad (12)$$

with the condition

$$\theta_{n, m}^{\text{Ch}} = 0, \text{ for } n = 0 \text{ or } m = 0, \quad (13)$$

and then find the conditional mean first passage time to cheater fixation according to

$$\tau_{n, m}^{\text{Ch}} = \frac{\theta_{n, m}^{\text{Ch}}}{\pi_{n, m}^{\text{Ch}}}. \quad (14)$$

Similarly, for the mean extinction time we solve

$$\begin{aligned} \lambda_{n, m}^{\text{Pr}} (\mathcal{T}_{n+1, m} - \mathcal{T}_{n, m}) + \mu_{n, m}^{\text{Pr}} (\mathcal{T}_{n-1, m} - \mathcal{T}_{n, m}) \\ + \lambda_{n, m}^{\text{Ch}} (\mathcal{T}_{n, m+1} - \mathcal{T}_{n, m}) + \mu_{n, m}^{\text{Ch}} (\mathcal{T}_{n, m-1} - \mathcal{T}_{n, m}) = -1 \end{aligned} \quad (15)$$

with the condition

$$\mathcal{T}_{n, m} = 0, \text{ for } n = 0 \text{ and } m = 0. \quad (16)$$

Directly solving the linear system of equations represented by Eq. 15 can lead to numerical instability when the mean extinction times are large. To account for these numerical issues we also calculated the mean extinction time using the analytical formula for pure producer or cheater populations with adjoint reflecting boundary conditions at  $n = N$  and  $m = N$  [38, 39, 40]

$$\mathcal{T}_{n, 0} = \sum_{i=1}^n \left( \frac{1}{\mu_{i, 0}^{\text{Pr}}} + \sum_{j=1}^{N-i} \frac{1}{\mu_{i+j, 0}^{\text{Pr}}} \prod_{l=1}^j \frac{\lambda_{i+l-1, 0}^{\text{Pr}}}{\mu_{i+l-1, 0}^{\text{Pr}}} \right) \quad (17)$$

$$\mathcal{T}_{0, m} = \sum_{i=1}^m \left( \frac{1}{\mu_{0, i}^{\text{Ch}}} + \sum_{j=1}^{N-i} \frac{1}{\mu_{0, i+j}^{\text{Ch}}} \prod_{l=1}^j \frac{\lambda_{0, i+l-1}^{\text{Ch}}}{\mu_{0, i+l-1}^{\text{Ch}}} \right) \quad (18)$$

and direct calculations of fixation probabilities for each point along the pure producer and cheater axes. We use the notation  $\pi_{n,m}^{i,0}$  and  $\pi_{n,m}^{0,j}$  to indicate the probability that a population starting with  $n$  producers and  $m$  cheaters will have producers fix with  $i$  total producers and will have cheaters fix with  $j$  total cheaters, respectively. We then estimate the mean extinction time according to

$$\mathcal{T}_{n,m} = \sum_{i=1}^N \pi_{n,m}^{i,0} \mathcal{T}_{i,0} + \sum_{j=1}^N \pi_{n,m}^{0,j} \mathcal{T}_{0,j}, \quad (19)$$

under the assumption that producers or cheaters will quickly fix followed by a much longer period with a pure population before extinction.

All quantities detailed in this section were calculated using the linear system solver in the Python NumPy package [41] and the sparse matrix module of the SciPy package [42].

### 4.3 Stochastic simulations

All stochastic simulations were performed using Gillespie’s algorithm [26, 27] implemented in the Gillespy2 Python package [43]. Each simulation was repeated 100 times in order to estimate fixation probabilities and mean first passage times.

### 4.4 General methods

The figures in this article were created using Inkscape 0.92 [44] and Matplotlib 3.1.1 [45] in a Python 3.7 Jupyter Notebook [46].

## 5 Acknowledgements

A.S.M. and A.W.E. were partially supported by the United States Defense Advanced Research Projects Agency RadioBio program under grant number HR001117C0125, and by a Discovery grant from the Natural Sciences and Engineering Research Council of Canada. P.J.T. was partially supported by National Science Foundation grant DMS-2052109, and by the Oberlin College Libraries.

## References

- [1] Stuart A West, Ashleigh S Griffin, Andy Gardner, and Stephen P Diggle. Social evolution theory for microorganisms. *Nature Reviews Microbiology*, 4(8):597–607, 2006.
- [2] Melissa B Miller and Bonnie L Bassler. Quorum sensing in bacteria. *Annual Reviews in Microbiology*, 55(1):165–199, 2001.
- [3] Rosemary J Redfield. Is quorum sensing a side effect of diffusion sensing? *Trends in Microbiology*, 10(8):365–370, 2002.
- [4] Stuart A West, Klaus Winzer, Andy Gardner, and Stephen P Diggle. Quorum sensing and the confusion about diffusion. *Trends in microbiology*, 20(12):586–594, 2012.
- [5] Daniel M Cornforth, Roman Popat, Luke McNally, James Gurney, Thomas C Scott-Phillips, Alasdair Ivens, Stephen P Diggle, and Sam P Brown. Combinatorial quorum sensing allows bacteria to resolve their social and physical environment. *Proceedings of the National Academy of Sciences*, 111(11):4280–4284, 2014.
- [6] Jonas Schluter, Armin P Schoech, Kevin R Foster, and Sara Mitri. The evolution of quorum sensing as a mechanism to infer kinship. *PLoS Computational Biology*, 12(4):e1004848, 2016.
- [7] Eric K. Chu, Alex Groisman, and Andre Levchenko. Environmental sensing in dynamic quorum responses. *bioRxiv*, 745091, 2019.

- [8] Stephen P Diggle, Ashleigh S Griffin, Genevieve S Campbell, and Stuart A West. Cooperation and conflict in quorum-sensing bacterial populations. *Nature*, 450(7168):411–414, 2007.
- [9] Kelsi M Sandoz, Shelby M Mitzimberg, and Martin Schuster. Social cheating in *Pseudomonas aeruginosa* quorum sensing. *Proceedings of the National Academy of Sciences U.S.A.*, 104(40):15876–15881, 2007.
- [10] Ashleigh S Griffin, Stuart A West, and Angus Buckling. Cooperation and competition in pathogenic bacteria. *Nature*, 430(7003):1024–1027, 2004.
- [11] Ajai A Dandekar, Sudha Chugani, and E Peter Greenberg. Bacterial quorum sensing and metabolic incentives to cooperate. *Science*, 338(6104):264–266, 2012.
- [12] John S Chuang, Olivier Rivoire, and Stanislas Leibler. Simpson’s paradox in a synthetic microbial system. *Science*, 323(5911):272–275, 2009.
- [13] Stephen P Diggle, Andy Gardner, Stuart A West, and Ashleigh S Griffin. Evolutionary theory of bacterial quorum sensing: when is a signal not a signal? *Philosophical Transactions of the Royal Society B: Biological Sciences*, 362(1483):1241–1249, 2007.
- [14] Richard C Allen, Luke McNally, Roman Papat, and Sam P Brown. Quorum sensing protects bacterial co-operation from exploitation by cheats. *The ISME Journal*, 10(7):1706–1716, 2016.
- [15] Sophie E Darch, Stuart A West, Klaus Winzer, and Stephen P Diggle. Density-dependent fitness benefits in quorum-sensing bacterial populations. *Proceedings of the National Academy of Sciences U.S.A.*, 109(21):8259–8263, 2012.
- [16] Marcos M Vasconcelos, Odilon Câmara, Urbashi Mitra, and James Boedicker. A sequential decision making model of bacterial growth via quorum sensing. In *2018 52nd Asilomar Conference on Signals, Systems, and Computers*, pages 1817–1821. IEEE, 2018.
- [17] Marcos M Vasconcelos, Urbashi Mitra, Odilon Câmara, Manasi S Gangan, and James Boedicker. A continuous-time decision-making model for bacterial growth via quorum sensing: theory and evidence. In *Proceedings of the Sixth Annual ACM International Conference on Nanoscale Computing and Communication*, pages 1–6, 2019.
- [18] Anand Pai and Lingchong You. Optimal tuning of bacterial sensing potential. *Molecular Systems Biology*, 5(1):286, 2009.
- [19] George WA Constable, Tim Rogers, Alan J McKane, and Corina E Tarnita. Demographic noise can reverse the direction of deterministic selection. *Proceedings of the National Academy of Sciences U.S.A.*, 113(32):E4745–E4754, 2016.
- [20] Helen K Alexander and R Craig MacLean. Stochastic bacterial population dynamics restrict the establishment of antibiotic resistance from single cells. *Proceedings of the National Academy of Sciences U.S.A.*, 117(32):19455–19464, 2020.
- [21] Peter Jorth, Benjamin J Staudinger, Xia Wu, Katherine B Hisert, Hillary Hayden, Jayanthi Garudathri, Christopher L Harding, Matthew C Radey, Amir Rezaayat, Gilbert Bautista, et al. Regional isolation drives bacterial diversification within cystic fibrosis lungs. *Cell Host & Microbe*, 18(3):307–319, 2015.
- [22] Jaideep Joshi and Vishwesh Guttal. Demographic noise and cost of greenbeard can facilitate greenbeard cooperation. *Evolution*, 72(12):2595–2607, 2018.
- [23] Stuart A West and Andy Gardner. Altruism, spite, and greenbeards. *Science*, 327(5971):1341–1344, 2010.
- [24] Keith Jensen. Punishment and spite, the dark side of cooperation. *Philosophical Transactions of the Royal Society B: Biological Sciences*, 365(1553):2635–2650, 2010.

- [25] Vera Bettenworth, Benedikt Steinfeld, Hilke Duin, Katrin Petersen, Wolfgang R Streit, Ilka Bischofs, and Anke Becker. Phenotypic heterogeneity in bacterial quorum sensing systems. *Journal of Molecular Biology*, 431(23):4530–4546, 2019.
- [26] Daniel T Gillespie. A general method for numerically simulating the stochastic time evolution of coupled chemical reactions. *Journal of Computational Physics*, 22(4):403–434, 1976.
- [27] Daniel T Gillespie. Exact stochastic simulation of coupled chemical reactions. *The Journal of Physical Chemistry*, 81(25):2340–2361, 1977.
- [28] Eric L Bruger, Daniel J Snyder, Vaughn S Cooper, and Christopher M Waters. Quorum sensing provides a molecular mechanism for evolution to tune and maintain investment in cooperation. *The ISME Journal*, 15(4):1236–1247, 2021.
- [29] Meizhen Wang, Amy L Schaefer, Ajai A Dandekar, and E Peter Greenberg. Quorum sensing and policing of *Pseudomonas aeruginosa* social cheaters. *Proceedings of the National Academy of Sciences U.S.A.*, 112(7):2187–2191, 2015.
- [30] William S Cooper. Expected time to extinction and the concept of fundamental fitness. *Journal of Theoretical Biology*, 107(4):603–629, 1984.
- [31] Johan AJ Metz, Roger M Nisbet, and Stefan AH Geritz. How should we define ‘fitness’ for general ecological scenarios? *Trends in Ecology & Evolution*, 7(6):198–202, 1992.
- [32] R Fredrik Inglis, Andy Gardner, Pierre Cornelis, and Angus Buckling. Spite and virulence in the bacterium *Pseudomonas aeruginosa*. *Proceedings of the National Academy of Sciences U.S.A.*, 106(14):5703–5707, 2009.
- [33] William D Hamilton. The genetical evolution of social behaviour. I. *Journal of Theoretical Biology*, 7(1):1–16, 1964.
- [34] William D Hamilton. The genetical evolution of social behaviour. II. *Journal of Theoretical Biology*, 7(1):17–52, 1964.
- [35] Silja Heilmann, Sandeep Krishna, and Benjamin Kerr. Why do bacteria regulate public goods by quorum sensing?—how the shapes of cost and benefit functions determine the form of optimal regulation. *Frontiers in Microbiology*, 6:767, 2015.
- [36] Mahendra Kumar Prajapat, Isha Shroff, RG Brajesh, and Supreet Saini. Analysis of a strategy for cooperating cells to survive the presence of cheaters. *Molecular BioSystems*, 12(11):3338–3346, 2016.
- [37] Nicolaas G van Kampen. *Stochastic processes in physics and chemistry*. Elsevier, 3rd edition, 2011.
- [38] Charles R Doering, Khachik V Sargsyan, and Leonard M Sander. Extinction times for birth-death processes: Exact results, continuum asymptotics, and the failure of the Fokker–Planck approximation. *Multiscale Modeling & Simulation*, 3(2):283–299, 2005.
- [39] Crispin Gardiner. *Stochastic methods*, volume 4. Springer Berlin, 2009.
- [40] Alexander G Strang, Karen C Abbott, and Peter J Thomas. How to avoid an extinction time paradox. *Theoretical Ecology*, 12(4):467–487, 2019.
- [41] Charles R. Harris, K. Jarrod Millman, St’efan J. van der Walt, Ralf Gommers, Pauli Virtanen, David Cournapeau, Eric Wieser, Julian Taylor, Sebastian Berg, Nathaniel J. Smith, Robert Kern, Matti Picus, Stephan Hoyer, Marten H. van Kerkwijk, Matthew Brett, Allan Haldane, Jaime Fern’andez del R’io, Mark Wiebe, Pearu Peterson, Pierre G’erard-Marchant, Kevin Sheppard, Tyler Reddy, Warren Weckesser, Hameer Abbasi, Christoph Gohlke, and Travis E. Oliphant. Array programming with NumPy. *Nature*, 585(7825):357–362, September 2020.

- [42] Pauli Virtanen, Ralf Gommers, Travis E Oliphant, Matt Haberland, Tyler Reddy, David Cournapeau, Evgeni Burovski, Pearu Peterson, Warren Weckesser, Jonathan Bright, et al. Scipy 1.0: fundamental algorithms for scientific computing in python. *Nature Methods*, 17(3):261–272, 2020.
- [43] John H Abel, Brian Drawert, Andreas Hellander, and Linda R Petzold. Gillespy: a python package for stochastic model building and simulation. *IEEE Life Sciences Letters*, 2(3):35–38, 2016.
- [44] Inkscape 0.92, 2017. <https://inkscape.org/>.
- [45] John D Hunter. Matplotlib: A 2d graphics environment. *Computing in Science & Engineering*, 9(3):90–95, 2007.
- [46] Thomas Kluyver, Benjamin Ragan-Kelley, Fernando Pérez, Brian Granger, Matthias Bussonnier, Jonathan Frederic, Kyle Kelley, Jessica Hamrick, Jason Grout, Sylvain Corlay, Paul Ivanov, Damián Avila, Safia Abdalla, and Carol Willing. Jupyter notebooks – a publishing format for reproducible computational workflows. In F. Loizides and B. Schmidt, editors, *Positioning and Power in Academic Publishing: Players, Agents and Agendas*, pages 87 – 90. IOS Press, 2016.
